# Supplementary material for: Interface Schottky barrier engineering via strain in metal–semiconductor composites
Source: Royal Society of Chemistry journal article supplement (doi:10.1039/c5nr05583k), 2015-10-13
Supplement: c5nr05583k1.pdf [file c5nr05583k1.pdf]

Electronic supplementary information for “**Interface Schottky barrier engineering via strain in metal–semiconductor composite**”

Xiangchao Ma,<sup>a</sup> Ying Dai,<sup>a,\*</sup> Lin Yu,<sup>a</sup> and Baibiao Huang<sup>a,\*</sup>

<sup>a</sup>School of Physics, State Key Laboratory of Crystal Materials, Shandong University, Jinan 250100, People’s Republic of China

\*Y. Dai: [daiy60@sina.com](mailto:daiy60@sina.com)

\*B. Huang: [bbhuang@sdu.edu.cn](mailto:bbhuang@sdu.edu.cn)

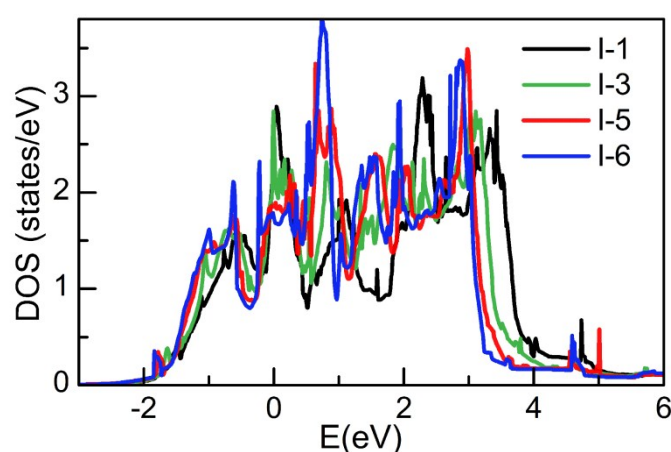

**Figure S1.** Density of states (DOS) of Au 5d states of Au in the same strained conditions as that in the I-1, I-3, I-5, and I-6 models, respectively. They are aligned by using their respective macroscopic average potentials as references.

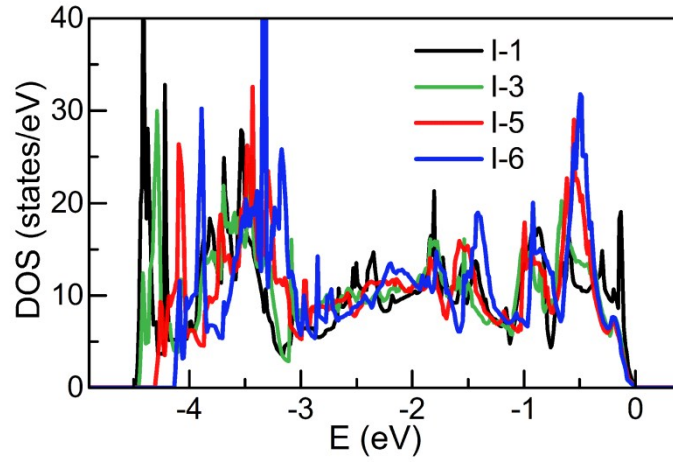

**Figure S2.** DOS for the valance bands of  $\text{TiO}_2$  in the same strained conditions as that in the I-1, I-3, I-5, and I-6 interface models, respectively. The Fermi levels for the three strained  $\text{TiO}_2$  are set at 0 eV.

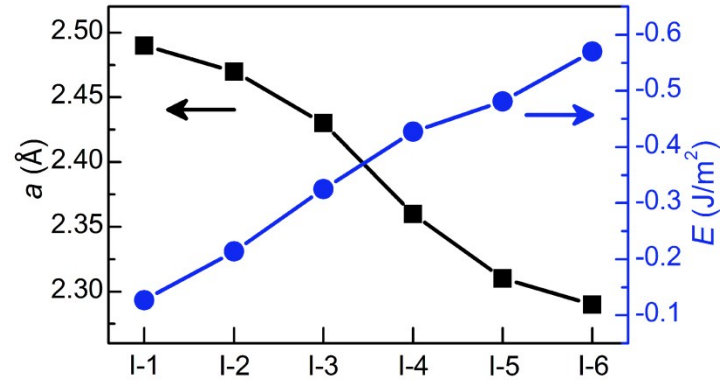

**Figure S3.** Interfacial Au- $\text{O}_{2\text{C}}$  bond length  $a$  and interfacial energy  $E$  as a function of strain.

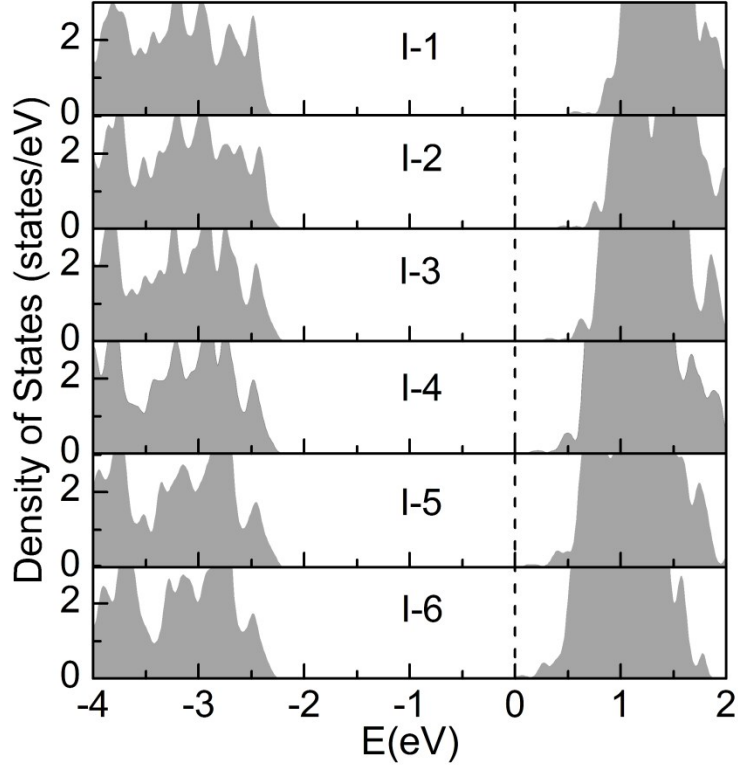

**Figure S4.** Local DOS for TiO<sub>2</sub> layers in the middle of the strained interfaces. The Fermi levels for all of the strained interfaces are set at 0 eV.

As shown in **Figure S4**, the Fermi level with respect to the VBM, which measures the  $\Phi_p$ , only exhibits tiny change with strain; while the Fermi level with respect to the CBM measuring the  $\Phi_n$  is significantly decreased. All of these are qualitatively in agreement with those obtained from the potential-line-up method.
